1 **Habitat deterioration despite protection: long-term declines of**  
2 **littoral area of fishponds in Czech nature reserves**

3 Vojtech Kolar<sup>1,2,\*</sup>, Kateřina Francová<sup>1</sup>, Jaroslav Vrba<sup>1</sup>, Stanislav Grill<sup>1</sup>, David S. Boukal<sup>1,2</sup>

4 <sup>1</sup>*Department of Ecosystem Biology, Faculty of Science, University of South Bohemia,*  
5 *Branišovská 1760, CZ-37005 České Budějovice, Czech Republic*

6 <sup>2</sup>*Institute of Entomology, Biology Centre of the Czech Academy of Sciences, Branišovská 31,*  
7 *370 05, CZ-37005 České Budějovice, Czech Republic*

8 \*Corresponding authors: V. Kolar, Department of Ecosystem Biology, Faculty of Science,  
9 University of South Bohemia, Branišovská 1760, CZ-37005 České Budějovice, Czech Republic

10 kolarvojta@seznam.cz, tel: (+420)387772282

11 ORCID ID V. Kolar (kolarvojta@seznam.cz): <https://orcid.org/0000-0001-6144-317X>

12 ORCID ID K. Francová (kfrancova@post.cz): <https://orcid.org/0000-0002-8658-3707>

13 ORCID ID J. Vrba (jaroslav.vrba@prf.jcu.cz): <https://orcid.org/0000-0003-2145-9024>

14 ORCID ID S. Grill (sgrill@prf.jcu.cz): <https://orcid.org/0000-0002-0500-4110>

15 ORCID ID D. S. Boukal (boukal@entu.cas.cz): <https://orcid.org/0000-0001-8181-7458>

16

## 17 Highlights

- 18 • Littoral vegetation in ponds supports high biodiversity but often lacks protection.
- 19 • We evaluated long-term changes in the littoral areas of fishponds in Czechia.
- 20 • The areas decreased markedly in both protected and unprotected ponds since 1950.
- 21 • Reserve duration, fishpond area and conservation target did not affect the trends.
- 22 • Changes in fishpond management are recommended for littoral area recovery.

23

## 24 Graphical abstract

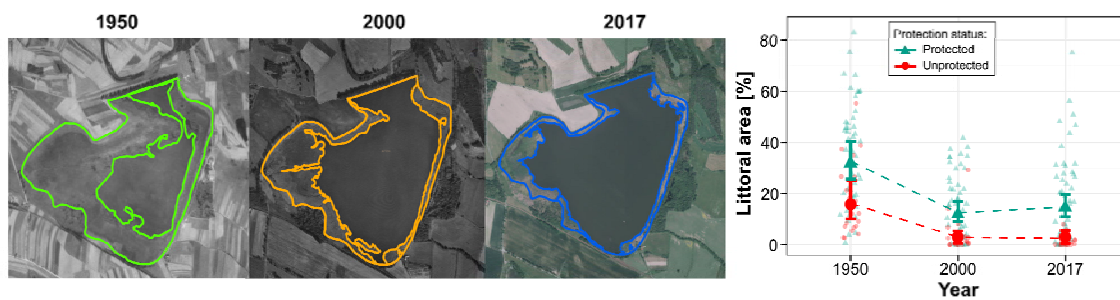

25

26

27 **Abstract**

28 Fishponds play a key role in current pondscapes in many developed countries. Their littoral  
29 areas, supporting multiple ecosystem functions including the maintenance of aquatic and  
30 riparian biodiversity, have been adversely affected by the move shift towards more intensive  
31 aquaculture and widespread eutrophication in the middle 20<sup>th</sup> century. To counteract these  
32 changes, many fishponds received some protection, but its long-term efficiency has not been  
33 studied. Here we focus on the role of conservation status in protecting the area of littoral  
34 areas of fishponds in Czechia between the years 1950 and 2019. We found that the  
35 conservation status of these fishponds did not prevent habitat deterioration in most of the  
36 fishponds, especially during the second half of the 20<sup>th</sup> century. Moreover, we detected no  
37 significant effects of the reserve establishment year, fishpond area and conservation target  
38 on the littoral areas. This suggests that the conservation measures are insufficient across  
39 fishpond reserve types. We attribute the negative trends to persisting high fish stocks,  
40 especially of common carp, and eutrophication resulting from additional feeding, pond  
41 manuring, and ongoing nutrient inputs from the pond catchments. Sediment dredging and  
42 high grazing pressure by waterfowl in some reserves can further aggravate the situation. We  
43 conclude that effective protection of the littoral areas requires a paradigm shift towards less  
44 intensive fish stock management, more frequent summer drainage, and effective reduction  
45 of all nutrient inputs to increase the water quality. Such measures can help recover the  
46 littoral areas and the associated biota.

47

48 **Keywords:** Biodiversity, macrophytes, management, man-made habitats, nature  
49 conservation

50 **1. Introduction**

51 Fishponds are the most common habitat of the central European pondscapes. Most of them  
52 were created at natural or seminatural sites such as peat bogs, floodplain forests, and  
53 wetland meadows centuries ago (Francová et al., 2019). While they primarily serve for fish  
54 production and water retention, they have also become important biodiversity hotspots  
55 after deterioration and destruction of many natural wetlands (Davidson, 2014; Reid et al.,  
56 2019, Kolar and Boukal, 2020). Environmental characteristics including the extent and  
57 diversity of submerged and emergent vegetation vary immensely both within and among  
58 fishponds, which makes them ideal to support high regional biodiversity (Wezel et al., 2014).  
59 Consequently, some fishponds became protected by national and European law.

60 Traditional fishpond management in central Europe including fish stocking,  
61 supplementary feeding, manuring, liming, drainage, and dredging intensified heavily during  
62 the 20<sup>th</sup> century to increase fish production. Moreover, phosphorus and nitrogen inputs in  
63 fishponds increased 40 and 9 times, respectively (Potužák et al., 2007). These changes led to  
64 an overall decline in the diversity of macrophytes (Francová et al., 2019), aquatic beetles  
65 (Kolar and Boukal, 2020), dragonflies (Šigutová et al., 2015), macrozoobenthos and  
66 zooplankton (Nieoczym and Kloskowski, 2014), amphibians (Kloskowski, 2010) and birds  
67 (Broyer and Curtet, 2012). Moreover, high stocks of common carp suppress large  
68 zooplankton, leading to a classical trophic cascade with frequent algal blooms and reduced  
69 water transparency (Matsuzaki et al., 2007; Potužák et al., 2007), and disturb the sediment  
70 that further reduces transparency (Roberts et al., 1995) and causes mechanical damage to  
71 submerged macrophytes (Broyer and Curtet, 2012; Matsuzaki et al., 2007). All these effects  
72 often lead to a substantial retreat of littoral areas.

73 Littoral areas are important hotspots of biodiversity in the fishpond ecosystems (Batzer  
74 and Wissinger, 1996; Francová et al., 2019), as most species inhabit shallow parts with  
75 submerged and emerged vegetation rather than open water (Kloskowski et al., 2020). Some  
76 taxa use these structured habitats as a refuge against predators (Warfe and Barmuta, 2004),  
77 while some predators seek littorals due to high prey availability (Kloskowski et al., 2020) or  
78 use the habitat structure to facilitate their hunting (Klecka and Boukal, 2012). Furthermore,  
79 littoral macrophytes can improve water quality, stabilize shores, and provide food for many  
80 organisms (Batzer and Wissinger, 1996; Roberts et al., 1995). Thus, their effective protection  
81 is necessary for many aquatic and semi-aquatic species, especially considering recent  
82 massive species extinctions and population decline (Eichenberg et al., 2021; Sánchez-Bayo  
83 and Wyckhuys, 2019).

84 While overall eutrophication and fish overstocking are known to severely affect the  
85 littoral environment, we need to develop efficient strategies to mitigate their adverse effects  
86 on pond ecosystems (Francová et al., 2019). In particular, we lack comparative studies of  
87 long-term trends of environmental conditions in fishponds and the efficiency of conservation  
88 measures such as legal protection of the fishpond habitats. To fill this gap, we analysed long-  
89 term trends in the extent of emerged macrophyte vegetation (hereafter 'littoral area') in  
90 legally protected and unprotected fishponds in Czechia. We expected the littoral areas in  
91 protected fishponds to remain stable or increase over time, especially in fishponds that were  
92 declared as nature reserves earlier, had a larger littoral area, or are smaller. The latter are  
93 used as nursery ponds and are usually less intensively managed than the larger  
94 main/ongrowing ponds (Francová et al., 2019). Furthermore, we hypothesized that pond  
95 reserves focused on macrophyte conservation will have larger littoral areas than those with  
96 other conservation targets (i.e., wetland communities and animals). Finally, we expected to

97 observe declines of the total littoral areas in unprotected ponds, especially if they were large  
98 and had initially large littoral areas that were destroyed by the intensive management  
99 practices summarized above. We use our findings to highlight current issues arising in  
100 effective protection of fishpond littoral areas and propose measures required to amend the  
101 situation.

102

## 103 **2. Materials and Methods**

### 104 **2.1 Study area**

105 We analysed the effect of conservation status on the littoral areas of fishponds in South  
106 Bohemia (Fig. 1). For the sake of this study, we define fishpond as a man-made standing  
107 water body larger than 0.5 ha. More than 7,000 (total area >30,000 ha) fishponds in this  
108 region also include over 60 fishponds with a legal protection status (hereafter ‘fishpond  
109 reserves’).

### 110 **2.2 Analyses**

111 To quantify changes in the littoral area (i.e., the extent of the surface covered with emergent  
112 macrophyte vegetation) of fishponds, we used orthophoto maps (CUZK, 2021) from the  
113 years 1949–1953 (hereafter referred to as ‘1950’), 1998–2001 (as ‘2000’), and 2017–2019  
114 (as ‘2017’, Table A1). We chose current fishpond reserves and located them first on the  
115 orthophoto maps from 1950; note that only three fishponds were already protected at that  
116 time (Table A1). We selected only fishponds for which high-quality images were available,  
117 and eliminated those with image noise (e.g., clouds over the fishpond) and those with  
118 unclear limits of the littoral and open-water areas. We could not locate several protected  
119 fishponds on the 1950 maps as they were likely built or restored later. This procedure

120 yielded 46 protected and 20 unprotected fishponds; the latter were randomly selected  
121 within a radius of 20 km around a subset of the protected ones as controls (Fig. 1A).

122 Orthophoto maps were analysed by one person (V.K.) to avoid personal biases. All areas  
123 estimated from the maps were processed and vectorized in ArcGIS software (v. 10.7.1, ESRI,  
124 2011). We initially estimated the total surface area of each fishpond, excluding any islands if  
125 present but including the littoral area, in the most recent maps from 2017. We then  
126 estimated the total littoral area around the shores and islands of each fishpond in the same  
127 year and years 1950 and 2000, and corrected for changes in the total surface area between  
128 the earlier dates and 2017 if necessary (Fig. 1B–D and Table A1). Littoral area was expressed  
129 as a proportion of the total fishpond area in that year. We collected the following  
130 explanatory variables for each fishpond (only for protected ones): year of reserve  
131 establishment, total surface area in 2017, littoral area in 1950, and conservation target  
132 divided into three categories: macrophytes, wetland communities (i.e., animals including  
133 amphibians, birds, insects and/or macrophytes together), and animals (amphibians and/or  
134 birds) according to the official database of the Nature Conservation Agency of the Czech  
135 Republic (AOPK ČR, 2020).

136 We used a model selection approach in which we built a set of candidate models and  
137 used the corrected Akaike information criterion (AICc) to rank these models and identify the  
138 most parsimonious ones (Burnham and Anderson, 2002). Temporal differences in the littoral  
139 area proportions were first analysed with generalised linear mixed models (GLMMs) using  
140 beta regression with a logit link function. Zero proportions were adjusted to 0.0001 ( $n = 11$ )  
141 prior to analysis. We first considered year as an explanatory variable with three levels  
142 ('1950', '2000' and '2017') and then the actual year of orthophoto imaging as a continuous  
143 explanatory variable. In both analyses, we also considered protection status as another

144 explanatory variable and used fishpond identity as a random intercept and slope (Table A1).  
145 In the latter analysis, we considered year as a linear term or second-order polynomial and  
146 added a random intercept for the year effect. This yielded five and seven candidate models  
147 in each respective analysis (Table A2A).

148 We further calculated the  $\ln$ -transformed ratio of the total littoral area in each fishpond  
149 reserve in 2017 and 1950 to measure its rate of change, with negative values corresponding  
150 to declining littoral areas. The data were approximately normally distributed with four  
151 strong outliers corresponding to nearly lost littoral areas. We fitted them with a set of eight  
152 robust linear regressions linking the rate of change to the conservation target (always  
153 included in the models; its significance in the most parsimonious model was assessed by an  
154 ANOVA) and a linear combination of up to three additional explanatory variables: year of  
155 establishment, total littoral area in 1950, and  $\log_{10}$ -transformed total fishpond area (Table  
156 A2C).

157 We used the function *glmmTMB* (Brooks et al., 2017) to analyse the GLMMs, the  
158 function *rlm* (Venables and Ripley, 2002) for the robust regressions, and function *emmeans*  
159 (Lenth, 2021) for planned comparisons in the most parsimonious model (Table A3 for  
160 details). All analyses were conducted in R (R Core Team, 2020).

161

### 162 **3. Results and Discussion**

#### 163 *3.1 Shrinking of littoral areas in fishponds: main patterns and likely causes*

164 Model selection for the temporal differences with year as a factor showed that the  
165 proportion of littoral area depended on the interaction of time and protection status (Fig. 2A  
166 and Table A2). Planned comparisons confirmed that (future) reserves had more developed



167 littoral areas than unprotected fishponds both in 1950 and in 2000 and 2017, and that  
168 littoral areas in 2000 and 2017 were significantly smaller than in 1950 in both fishpond  
169 categories (Table A3). As a result, littoral areas of the protected fishponds are now  
170 comparable to their extent in unprotected fishponds in 1950 (Fig. 2A).

171 The most parsimonious model for the continuous temporal trends identified strong  
172 declines in the extent of littoral areas in both protected and unprotected fishponds until ca.  
173 year 2000 with a weak trend towards subsequent recovery in protected but not in  
174 unprotected fishponds, in which the decline continued (Fig. 2B). Indeed, decreases in littoral  
175 areas in protected fishponds were more common ( $n=38$ ) and on average more dramatic  
176 (mean:  $-22.5\%$ , range:  $-0.5$  to  $-58.2\%$ ) than increases ( $n=8$ , mean:  $12.5\%$ , range:  $0.8$ – $43.0\%$ ),  
177 while littoral areas declined in all unprotected fishponds ( $n=20$ , mean:  $-16.0\%$ , range:  $-2.4$   
178 to  $-54.0\%$ ; Table A1).

179 The observed degradation of littoral areas is likely connected to the intensification of  
180 fishpond management since the 1950s. Increased manuring and supplementary feeding,  
181 overstocking dominated by common carp, and spread of invasive species such as topmouth  
182 gudgeon and Prussian carp led to decreased water quality (Potužák et al., 2007). The  
183 resulting eutrophic to hypertrophic conditions cause frequent long periods of turbid water  
184 and light limitation for macrophytes, further aggravated by bioturbation and grazing on  
185 macrophytes by common carp and other cyprinids. Moreover, summer drainage can help  
186 restore littoral areas and increase the diversity of macrophytes (Šumberová et al., 2006;  
187 Broyer and Curtet, 2012; Francová et al., 2021) but is often omitted in intensive  
188 management.

189 Degradation or complete disappearance of some littorals could be attributed to dredging  
190 (Fig. 1D). Until recently, many fishponds were either completely or partially dredged with  
191 heavy machinery (IUCN, 1997) to increase the open water area and volume to accommodate  
192 larger fish stocks. The dredged material was often left around the banks and sometimes  
193 used to build islands providing additional bird habitats (IUCN, 1997). However, the material  
194 left on the banks devastated an important water-land transitional ecotone in many reserves  
195 and disabled littoral renewal. Widespread lack of data on the extent and timing of dredging  
196 after 1950 prevented us from quantifying its effect.

197 Traditional management also includes direct mowing of macrophytes (Francová et al.,  
198 2019). This practice should be strictly prohibited in fishpond reserves unless it protects focal  
199 protected species from excessive macrophyte growth and establishment of invasive species.

200 Finally, high waterfowl densities can degrade and destroy the littoral vegetation even in  
201 shallow parts that are inaccessible to fish. They can do so directly by grazing (e.g., geese and  
202 swans) and indirectly by release of additional nutrients (Hoyer and Canfield, 1994; Noordhuis  
203 et al., 2002).

204

### 205 *3.2 Effects of fishpond area, conservation period and target conservation category on the* 206 *relative change of littoral area*

207 The most parsimonious model suggests that the relative change in the littoral area between  
208 1950 and 2017 was unaffected by the fishpond area, littoral area in 1950, year of reserve  
209 establishment (Table A2, Fig 1A), and target conservation category (ANOVA:  $F_2 = 0.345$ ,  $P =$   
210  $0.71$ ). The other plausible model with fishpond area as another predictor (Table A2) showed

211 that larger fishponds tended to more pronounced declines in the littoral area than smaller  
212 ones (details not shown).

213 The missing relationship between the reserve age and littoral area recovery is surprising.  
214 Our data show that neither >50 years of a reserve status may protect the littoral areas, nor  
215 up to 30 years of protection may enable recovery (see Table A1 for details). This is likely due  
216 to inappropriate management of protected fishponds. Similar negative temporal trends are  
217 known in terrestrial biota (Gray et al., 2016a; Rada et al., 2019). Site-specific conservation  
218 management for each reserve is thus needed (Gray et al. 2016), especially for fishponds that  
219 are strongly affected by both target conservation management and human impacts on the  
220 surrounding landscape and catchment (Wezel et al., 2013).

221 Littoral areas tended to retreat more in larger fishponds, while all cases in which the  
222 littoral area increased between 1950 and 2017 were confined to smaller ponds (surface area  
223 <10 ha). This is most likely related to fishpond management types: while smaller fishponds  
224 are usually used for fish fry breeding, larger ones are used as main on-growing ponds  
225 (Francová et al., 2019, 2021). This does not mean that larger reserves are less valuable but  
226 highlights that they deserve proper conservation and less intensive fishery management. We  
227 thus recommend protecting fishponds with well-developed littoral areas and harbouring  
228 protected species irrespectively of the fishpond size (Francová et al. 2021; Kolář & Boukal  
229 2020).

230 Interestingly, we found no link between the changes in the littoral area and the  
231 conservation target category. The trends were most variable in reserves with wetland  
232 communities as the declared conservation target and least variable (and always negative) in  
233 reserves focused on macrophytes. This intriguing result suggests a systemic failure of nature  
234 conservation across fishponds with different conservation focus. More detailed studies in

235 these reserves should confirm whether our, admittedly coarse, measures of the ongoing  
236 changes in the littoral areas also signal changes in population sizes or species richness of the  
237 target groups.

238

#### 239 **4. Conclusions**

240 Our study shows that legal protection did not avert a widespread decline of littoral areas in  
241 fishponds in Czechia since mid 20th century. This trend is detrimental as littoral areas  
242 support biodiversity across pondscapes (Vanacker et al., 2018). The observed declines signal  
243 the need for conservation agencies to balance fishpond management, focused on other  
244 services such as fish production, with conservation needs. We focused on littoral areas as  
245 indicators of overall habitat availability for various biota; further studies are required as  
246 many taxa inhabiting the littoral areas differ in their environmental requirements such as the  
247 extent or species composition of the submerged and emerged macrophytes. Requirements  
248 of different taxa could even be antagonistic (Broyer and Curtet, 2012), making general  
249 recommendations difficult. Another challenge lies in the implementation of desirable  
250 changes in fishpond management. Most Czech fishponds (including reserves) are privately  
251 owned, which limits options for externally imposed management plans.

252 While not a direct focus of our study, we reiterate that effective protection of the littoral  
253 part of fishpond ecosystems requires several well-known measures (Broyer and Curtet,  
254 2012; Kloskowski, 2010): (i) use of optimal fish stock size tailored for local abiotic conditions,  
255 (ii) use of fish polyculture with a higher proportion of predatory species, (iii) more effective  
256 or no use of supplementary feed, and (iv) no manure application. Wherever possible, this  
257 should be accompanied by reducing nutrient inputs from the surrounding catchment. In

258 addition, more frequent use of summer drainage could support the littoral area  
259 development. Taken together, these measures can reduce the nutrient loads and support  
260 growth of submerged and emerged macrophytes in the predominantly eutrophic central  
261 European pondscape.

262

## 263 **Acknowledgements**

264 We acknowledge financial support by the program of the Strategy AV 21 (VP21) from the  
265 Czech Academy of Sciences. V.K. was further supported by the Grant Agency of the  
266 University of South Bohemia (GAJU 116/2019/P).

267

## 268 **Declaration of competing interest**

269 None.

270

## 271 **Author statement**

272 Vojtech Kolar: Conceptualization; Methodology; Data curation; Investigation; Visualization;

273 Writing – Original Draft

274 Kateřina Francová: Writing – Original Draft

275 Jaroslav Vrba: Writing – Review & Editing

276 Stanislav Grill: Data curation

277 David S. Boukal: Methodology; Validation; Investigation, Writing – Review & Editing

278

## 279 **References**

- 280 AOPK ČR. 2019. Species Occurrence Database of the Nature Conservation Agency of the  
281 Czech Republic. <<https://drusop.nature.cz/portal/>>.
- 282 Batzer, D.P., Wissinger, S.A., 1996. Ecology of Insect Communities in Nontidal Wetlands.  
283 *Annu. Rev. Entomol.* 41, 75–100.
- 284 Brooks, M.E., Kristensen, K., van Benthem, K.J., Magnusson, A., Berg, C.W., Nielsen, A.,  
285 Skaug, H.J., Mächler, M., Bolker, B.M., 2017. *glmmTMB* balances speed and flexibility  
286 among packages for zero-inflated generalized linear mixed modeling. *R J.* 9, 378–400.
- 287 Broyer, J., Curtet, L., 2012. Biodiversity and fish farming intensification in French fishpond  
288 systems. *Hydrobiologia* 694, 205–218.
- 289 Burnham, K.P., Anderson, D.R., 2002. *Model Selection and Multimodel Inference: A Practical*  
290 *Information-Theoretic Approach*. Springer-Verlag, New York, NY.
- 291 CUZK, 2021. Ortofoto České Republiky. <<https://geoportal.cuzk.cz/>> .
- 292 Davidson, N.C., 2014. How much wetland has the world lost? Long-term and recent trends in  
293 global wetland area. *Mar. Freshw. Res.* 65, 934.
- 294 Eichenberg, D., Bowler, D.E., Bonn, A., Bruelheide, H., Grescho, V., Harter, D., Jandt, U., May,  
295 R., Winter, M., Jansen, F., 2021. Widespread decline in Central European plant diversity  
296 across six decades. *Glob. Chang. Biol.* 27, 1097–1110.
- 297 ESRI, 2011. *ArcGIS Desktop: Release 10*.
- 298 Francová, K., Šumberová, K., Janauer, G.A., Adámek, Z., 2019. Effects of fish farming on  
299 macrophytes in temperate carp ponds. *Aquac. Int.* 27, 413–436.

- 300 Francová, K., Šumberová, K., Kučerová, A., Šorf, M., Grill, S., Exler, N., Vrba, J., 2021. Drivers  
301 of plant species composition of ecotonal vegetation in two fishpond management  
302 types. *Wetl. Ecol. Manag.* 9.
- 303 Gray, C.L., Hill, S.L.L., Newbold, T., Hudson, L.N., Börger, L., Contu, S., Hoskins, A.J., Ferrier, S.,  
304 Purvis, A., Scharlemann, J.P.W., 2016a. Local biodiversity is higher inside than outside  
305 terrestrial protected areas worldwide. *Nat. Commun.* 7, 12306.
- 306 Hoyer, M. V., Canfield, D.E., 1994. Bird abundance and species richness on Florida lakes:  
307 Influence of trophic status, lake morphology, and aquatic macrophytes. *Hydrobiologia*  
308 279/280, 107–119.
- 309 IUCN, 1997. *Fishing for a Living - The Ecology and Economics of Fishponds in Central Europe.*  
310 IUCN, Gland, Switzerland, and Cambridge.
- 311 Klecka, J., Boukal, D.S., 2012. Who eats whom in a pool? A comparative study of prey  
312 selectivity by predatory aquatic insects. *PLoS One* 7, e37741.
- 313 Kloskowski, J., 2010. Fish farms as amphibian habitats: Factors affecting amphibian species  
314 richness and community structure at carp ponds in Poland. *Environ. Conserv.* 37, 187–  
315 194.
- 316 Kloskowski, J., Nieoczym, M., Stryjecki, R., 2020. Between-habitat distributions of pond  
317 tadpoles and their insect predators in response to fish presence. *Hydrobiologia* 847,  
318 1343–1356.
- 319 Kolar, V., Boukal, D.S., 2020. Habitat preferences of the endangered diving beetle  
320 *Graphoderus bilineatus*: Implications for conservation management. *Insect Conserv.*

- 321 Divers. 13, 480–494.
- 322 Lenth, R. V., 2021. emmeans: Estimated Marginal Means, aka Least-Squares Means. R  
323 package version 1.6.2-1.
- 324 Matsuzaki, S.I.S., Usio, N., Takamura, N., Washitani, I., 2007. Effects of common carp on  
325 nutrient dynamics and littoral community composition: Roles of excretion and  
326 bioturbation. *Fundam. Appl. Limnol.* 168, 27–38.
- 327 Nieoczym, M., Kloskowski, J., 2014. The role of body size in the impact of common carp  
328 *Cyprinus carpio* on water quality, zooplankton, and macrobenthos in ponds. *Int. Rev.*  
329 *Hydrobiol.* 99, 212–221.
- 330 Noordhuis, R., van der Molen, D.T., van den Berg, M.S., 2002. Response of herbivorous  
331 water-birds to the return of *Chara* in Lake Veluwemeer, The Netherlands. *Aquat. Bot.*  
332 72, 349–367.
- 333 Potužák, J., Hůda, J., Pechar, L., 2007. Changes in fish production effectivity in eutrophic  
334 fishponds - impact of zooplankton structure. *Aquac. Int.* 15, 201–210.
- 335 R Core Team, 2020. R: A language and environment for statistical computing. R Foundation  
336 for Statistical Computing.
- 337 Rada, S., Schweiger, O., Harpke, A., Kühn, E., Kuras, T., Settele, J., Musche, M., 2019.  
338 Protected areas do not mitigate biodiversity declines: A case study on butterflies.  
339 *Divers. Distrib.* 25, 217–224.
- 340 Reid, A.J., Carlson, A.K., Creed, I.F., Eliason, E.J., Gell, P.A., Johnson, P.T.J., Kidd, K.A.,  
341 MacCormack, T.J., Olden, J.D., Ormerod, S.J., Smol, J.P., Taylor, W.W., Tockner, K.,



- 342 Vermaire, J.C., Dudgeon, D., Cooke, S.J., 2019. Emerging threats and persistent  
343 conservation challenges for freshwater biodiversity. *Biol. Rev.* 94, 849–873.
- 344 Roberts, J., Chick, A., Oswald, L., Thompson, P., 1995. Effect of carp, *Cyprinus carpio* L., an  
345 exotic benthivorous fish, on aquatic plants and water quality in experimental ponds.  
346 *Mar. Freshw. Res.* 46, 1171.
- 347 Sánchez-Bayo, F., Wyckhuys, K.A.G., 2019. Worldwide decline of the entomofauna: A review  
348 of its drivers. *Biol. Conserv.* 232, 8–27.
- 349 Šigutová, H., Šigut, M., Dolný, A., 2015. Intensive fish ponds as ecological traps for  
350 dragonflies: An imminent threat to the endangered species *Sympetrum*  
351 *depressiusculum* (Odonata: Libellulidae). *J. Insect Conserv.* 19, 961–974.
- 352 Šumberová, K., Lososová, Z., Fabšičová, M., Horáková, V., 2006. Variability of vegetation of  
353 exposed pond bottoms in relation to management and environmental factors. *Preslia*  
354 78, 235–252.
- 355 Venables, W.N., Ripley, B.D., 2002. *Modern Applied Statistics with S*, Springer, New York, USA.
- 356 Vanacker, M., Wezel, A., Oertli, B., Robin, J., 2018. Water quality parameters and tipping  
357 points of dragonfly diversity and abundance in fishponds. *Limnology* 19, 321–333.
- 358 Warfe, D.M., Barmuta, L.A., 2004. Habitat structural complexity mediates the foraging  
359 success of multiple predator species. *Oecologia* 141, 171–178.
- 360 Wezel, A., Arthaud, F., Dufloux, C., Renoud, F., Vallod, D., Robin, J., Sarrazin, B., 2013. Varied  
361 impact of land use on water and sediment parameters in fish ponds of the Dombes  
362 agro-ecosystem, France. *Hydrol. Sci. J.* 58, 854–871.

363 Wezel, A., Oertli, B., Rosset, V., Arthaud, F., Leroy, B., Smith, R., Angélibert, S., Bornette, G.,  
364 Vallod, D., Robin, J., 2014. Biodiversity patterns of nutrient-rich fish ponds and  
365 implications for conservation. *Limnology* 15, 213–223.

366 **Figure captions:**

367 **Fig. 1.** Study area and examples of temporal changes in the littoral areas of fishponds. (A)  
368 Map of South Bohemia with the studied fishponds. (B–D) comparison of three different  
369 fishponds between years 1950 (green), 2000 (orange), and 2017 (blue): decrease of the  
370 littoral area in the Řežabinec fishpond (B), increase of the littoral area in the Blanko fishpond  
371 (C), and example of dredging that resulted in artificial islands in the Staré Jezero fishpond  
372 (D). Orthophoto maps of each fishpond are on a different scale. See Table A1 for details.

373

374 **Fig. 2.** Temporal trends in the proportion of littoral area (as % of total fishpond surface area)  
375 in fishponds between 1950, 2000 and 2017. (A) changes within each fishpond category;  
376 larger symbols show mean values and error bars 95% confidence intervals. (B) overall trend  
377 predicted by the most parsimonious model; dashed lines show 95% confidence intervals.  
378 Data for individual fishponds shown as small symbols.

379 Fig. 1

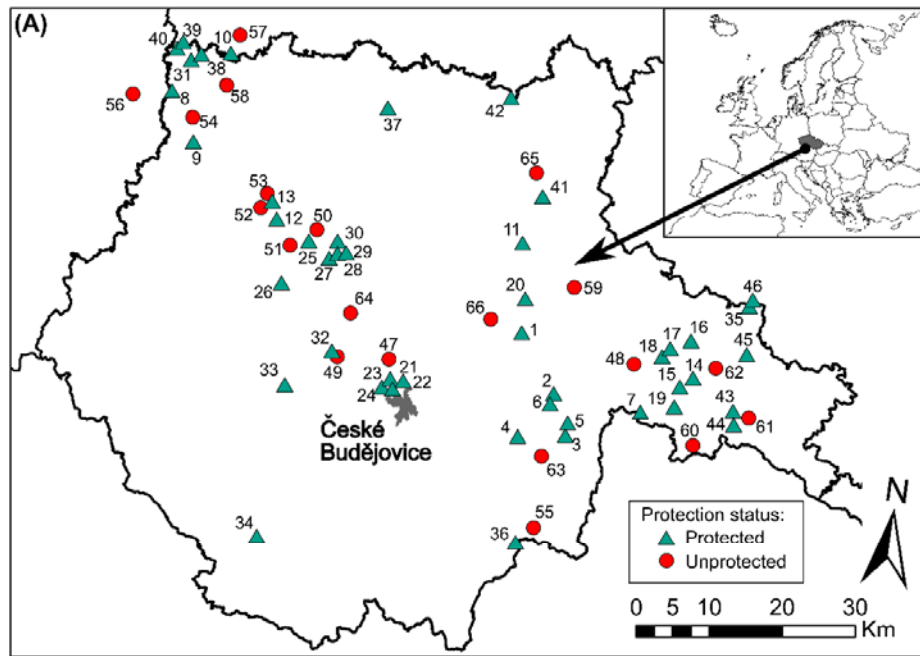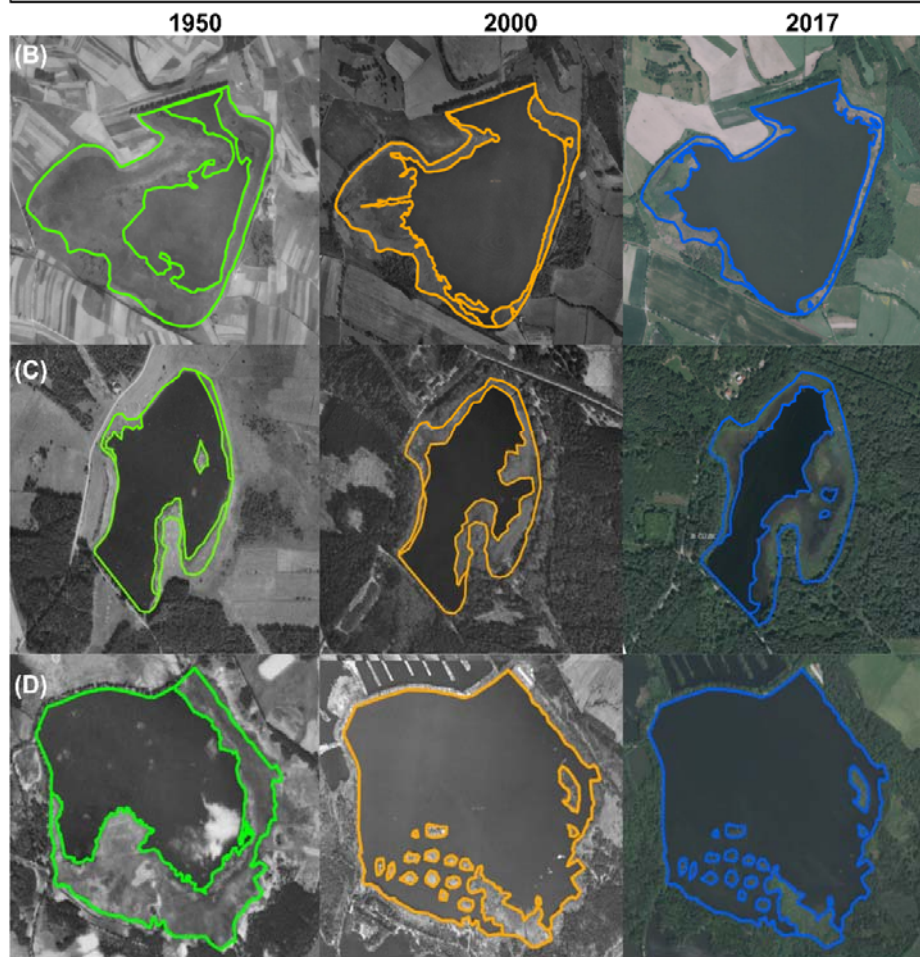



382 **Fig. 2**

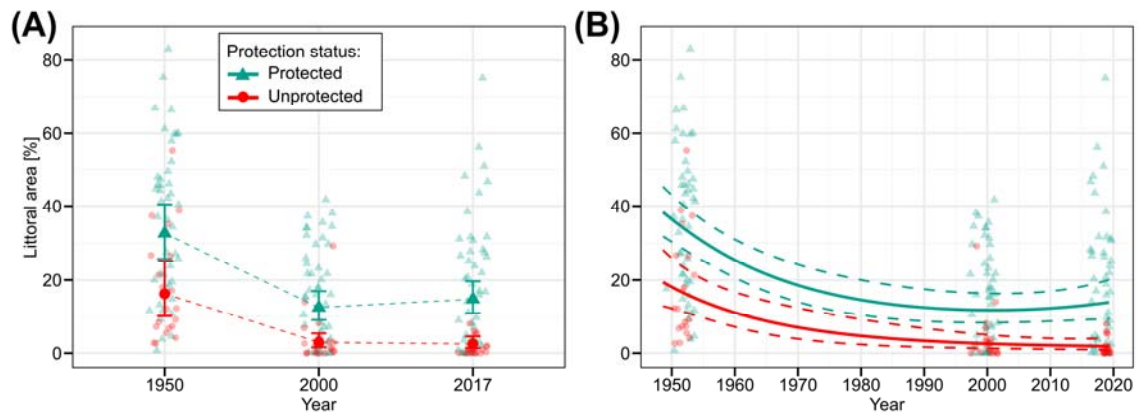

383
